# Supplementary material for: Efficient Elimination of Viruses from Garlic Using a Combination of Shoot Meristem Culture, Thermotherapy, and Chemical Treatment
Source: MDPI journal article supplement (doi:10.3390/pathogens12010129), 2023-01-12
Supplement: s1 [file s1]

**Supplementary Table S1:** Performance of *in vitro* plantlets treated for virus elimination, plantlets morphological traits, and post harvest bulbil characterization

| Treatment combination                  | Plant height (cm)   | Number of roots/plant | Number of leaves/plant | Leaves overall status                         | Bulbil induction (DAI) | Induction of bulbil                                    | Bulbil weight (mg) | Bulbil equatorial diameter (mm) | Bulbil polar diameter (mm) | Overall rating on growth parameters |
|----------------------------------------|---------------------|-----------------------|------------------------|-----------------------------------------------|------------------------|--------------------------------------------------------|--------------------|---------------------------------|----------------------------|-------------------------------------|
| Shoot meristem culture (SMC)           | 16.21 <sup>ab</sup> | 7 <sup>a</sup>        | 6 <sup>ab</sup>        | Dark green in colour and healthy              | 72 <sup>ab</sup>       | Bulbil induction was late compared to other treatments | 617 <sup>ab</sup>  | 10.48 <sup>a</sup>              | 10.81 <sup>a</sup>         | Good                                |
| Thermotherapy direct culture (TDC)     | 15.85 <sup>ab</sup> | 7 <sup>a</sup>        | 6 <sup>ab</sup>        | Dark green in colour and healthy              | 73 <sup>ab</sup>       |                                                        | 532 <sup>abc</sup> | 9.72 <sup>ab</sup>              | 10.55 <sup>a</sup>         | Good                                |
| Chemotherapy direct culture (CDC)      | 14.3 <sup>ab</sup>  | 5 <sup>cd</sup>       | 6 <sup>cd</sup>        | Greenish yellow colour leaf                   | 63 <sup>b</sup>        | Bulbil induction observed earlier than SMC & TDC       | 406 <sup>bcd</sup> | 9.09 <sup>ab</sup>              | 9.40 <sup>ab</sup>         | Average                             |
| Chemotherapy + meristem culture (CMC)  | 10.81 <sup>bc</sup> | 5 <sup>cd</sup>       | 6 <sup>cd</sup>        | Yellowish leaf and drying observed at the tip | 54 <sup>bc</sup>       | Bulbil induction was earlier than all other treatments | 200 <sup>de</sup>  | 7.01 <sup>bcd</sup>             | 7.15 <sup>bcd</sup>        | Poor                                |
| Thermotherapy + meristem culture (TMC) | 14.52 <sup>ab</sup> | 4 <sup>bc</sup>       | 6 <sup>cd</sup>        | Greenish yellow colour leaf                   | 62 <sup>b</sup>        | Bulbil induction observed earlier than SMC & TDC       | 406 <sup>bcd</sup> | 8.25 <sup>bc</sup>              | 9.16 <sup>bc</sup>         | Average                             |
| Thermotherapy + chemotherapy           | 11.95 <sup>bc</sup> | 5 <sup>bc</sup>       | 6 <sup>bc</sup>        | Greenish yellow colour leaf                   | 63 <sup>bc</sup>       | Bulbil induction observed                              | 329 <sup>cd</sup>  | 8.23 <sup>bc</sup>              | 8.53 <sup>bc</sup>         | Average                             |

|                                                                       |                     |                 |                 |                                                           |                  |                                        |                   |                    |                     |      |
|-----------------------------------------------------------------------|---------------------|-----------------|-----------------|-----------------------------------------------------------|------------------|----------------------------------------|-------------------|--------------------|---------------------|------|
| direct culture<br>(TCDC)                                              |                     |                 |                 |                                                           |                  | earlier than<br>SMC &<br>TDC           |                   |                    |                     |      |
| Thermotherapy<br>+<br>chemotherapy<br>+ meristem<br>culture<br>(TCMC) | 10.99 <sup>cd</sup> | 4 <sup>bc</sup> | 5 <sup>bc</sup> | Yellowish<br>leaf and<br>drying<br>observed<br>at the tip | 51 <sup>bc</sup> | Bulbil<br>induction<br>was<br>earliest | 175 <sup>de</sup> | 6.86 <sup>cd</sup> | 7.49 <sup>bcd</sup> | Poor |

(DAI-Days after Inoculation)
